# Supplementary material for: circFN1 Mediates Sorafenib Resistance of Hepatocellular Carcinoma Cells by Sponging miR-1205 and Regulating E2F1 Expression
Source: PubMed Central journal article supplement — Mol Ther Nucleic Acids. 2020 Sep 2;22:421–33. doi: 10.1016/j.omtn.2020.08.039 (PMC7533358; doi:10.1016/j.omtn.2020.08.039), 2020-09-02
Supplement: mmc1.pdf [file mmc1.pdf]

**OMTN, Volume 22**

**Supplemental Information**

**circFN1 Mediates Sorafenib Resistance  
of Hepatocellular Carcinoma Cells by Sponging  
miR-1205 and Regulating E2F1 Expression**

**Cheng Yang, Zhitao Dong, Han Hong, Binghua Dai, Feihong Song, Li Geng, Jiongjiong Lu, Jiamei Yang, Chengjun Sui, and Minhui Xu**

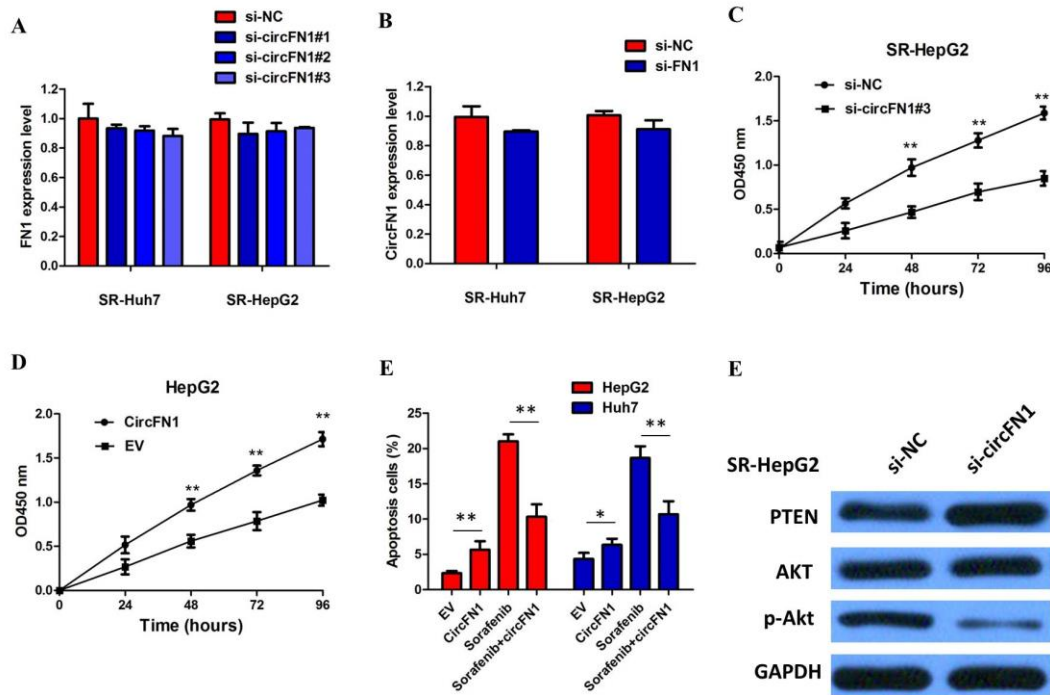

Figure S1. A-B. siRNA directed against the backsplice sequence knocked down only the circular transcript and did not affect the expression of linear species, and siRNA targeting the sequence in the linear transcript knocked down only the linear transcript and did not affect the expression of the circular transcript in SR-HepG2 and SR-Huh7 cells; C. The results of CCK8 assay showed that circFN1 silencing suppressed the proliferation of SR-HepG2 and SR-Huh7 cells after exposure to sorafenib (3  $\mu$ M); D. The results of CCK8 assay showed that the growth rate of HepG2 and Huh7 cells were significantly increased compared to the control group after overexpression of circFN1; E. Cell apoptosis assays revealed that overexpression of circFN1 significantly decreased the apoptosis of HepG2 and Huh7 cells after exposure to sorafenib (3  $\mu$ M) compared to the control group; F. Inhibition of circFN1 significantly

increased the expression of PTEN protein and decreased the activation of Akt in sorafenib-resistant HCC cells; All tests were at least performed three times. Data were expressed as mean  $\pm$ SD. \* $P < 0.05$ . \*\* $P < 0.01$ .
